# Supplementary material for: Targeting Secreted Protease/Anti-Protease Balance as a Vaccine Strategy against the Helminth Fasciola hepatica
Source: MDPI journal article supplement (doi:10.3390/vaccines10020155), 2022-01-20
Supplement: s1 [file s1]

## Supplementary Materials

### Figure S1. Evaluating the level of cross reactivity between the *Fasciola hepatica* stefin antibodies.

Methodology: rFhStf-1, FhStf-2 and FhStf-3 (2 $\mu$ g) were added to equal volumes of Laemmli sample buffer (BioRad) with 50 mM DTT, heated at 90°C for 10 min. Gel electrophoresis was carried out using 4-20% Mini-PROTEAN® TGX precast protein gel (BioRad) 1 x SDS running buffer at 115 V for 1h and 10 min.), with the Precision Plus Protein™ Dual Xtra pre-stained protein standard (BioRad). The proteins were transferred to nitrocellulose membranes in semi-dry conditions for 15 min at 25 V using the Trans-blot Turbo transfer system (BioRad). The membranes were blocked for 1h at room temperature in phosphate-buffered saline with 0.05% Tween 20 Detergent (PBST) with 5% skimmed milk, followed by three five min washes in PBST. The membranes were then probed with primary antibody (pre-immune sera,  $\alpha$ FhStf-1,  $\alpha$ FhStf-2,  $\alpha$ FhStf-3) diluted 1:150,000 in PBST with 2.5% milk for 1 h at room temperature. Following three five min washes in PBST, the membranes were probed with the secondary antibody, goat anti-rabbit IgG alkaline phosphatase conjugated (Sigma Aldrich) diluted 1:10,000 in PBST with 2.5% milk, for 1 h at room temperature. After three further five min washes in PBST, the membranes were developed for 2 min 30s with SigmaFast BCIP/NBT (Sigma Aldrich) and imaged using the G:BOX Chemi XRQ imaging system.

Western blot analysis of the three *F. hepatica* recombinant stefins probed with the polyclonal *F. hepatica* stefin antibodies. Immunoblots were probed with rabbit pre-immune serum as a negative control (Pre-immune), anti-rFhStf1 polyclonal antibodies raised in rabbit ( $\alpha$ FhStf-1), anti-rFhStf2 polyclonal antibodies raised in rabbit ( $\alpha$ FhStf-2), anti-rFhStf3 polyclonal antibodies raised in rabbit ( $\alpha$ FhStf-3).

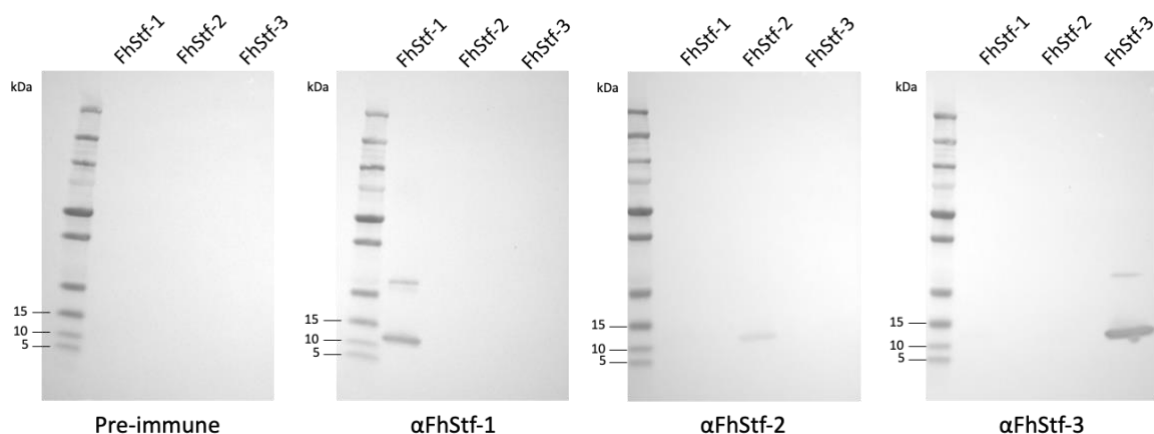

**Figure S2. Analysis of antibody responses to the *F. hepatica* recombinant antigens used in the vaccine cocktail compared with the diagnostic antigen, cathepsin L peptidase, displayed as per Figure 6.**

**(A) Antibody responses to the *F. hepatica* recombinant cathepsin L1 peptidase (rFhCL1).**

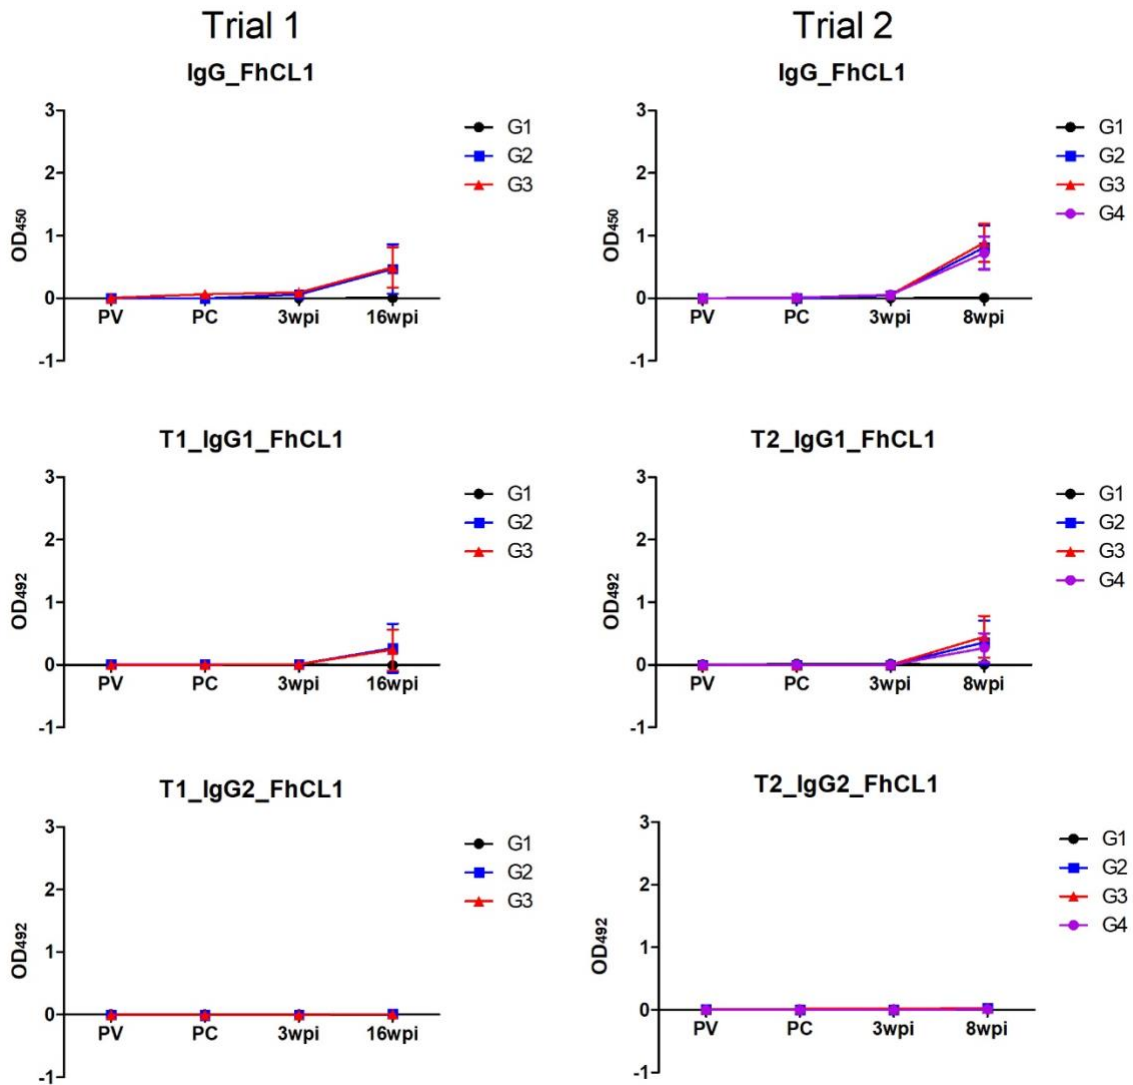

(B) Antibody responses to *F. hepatica* recombinant Stefin 2 (rFhStf-2).

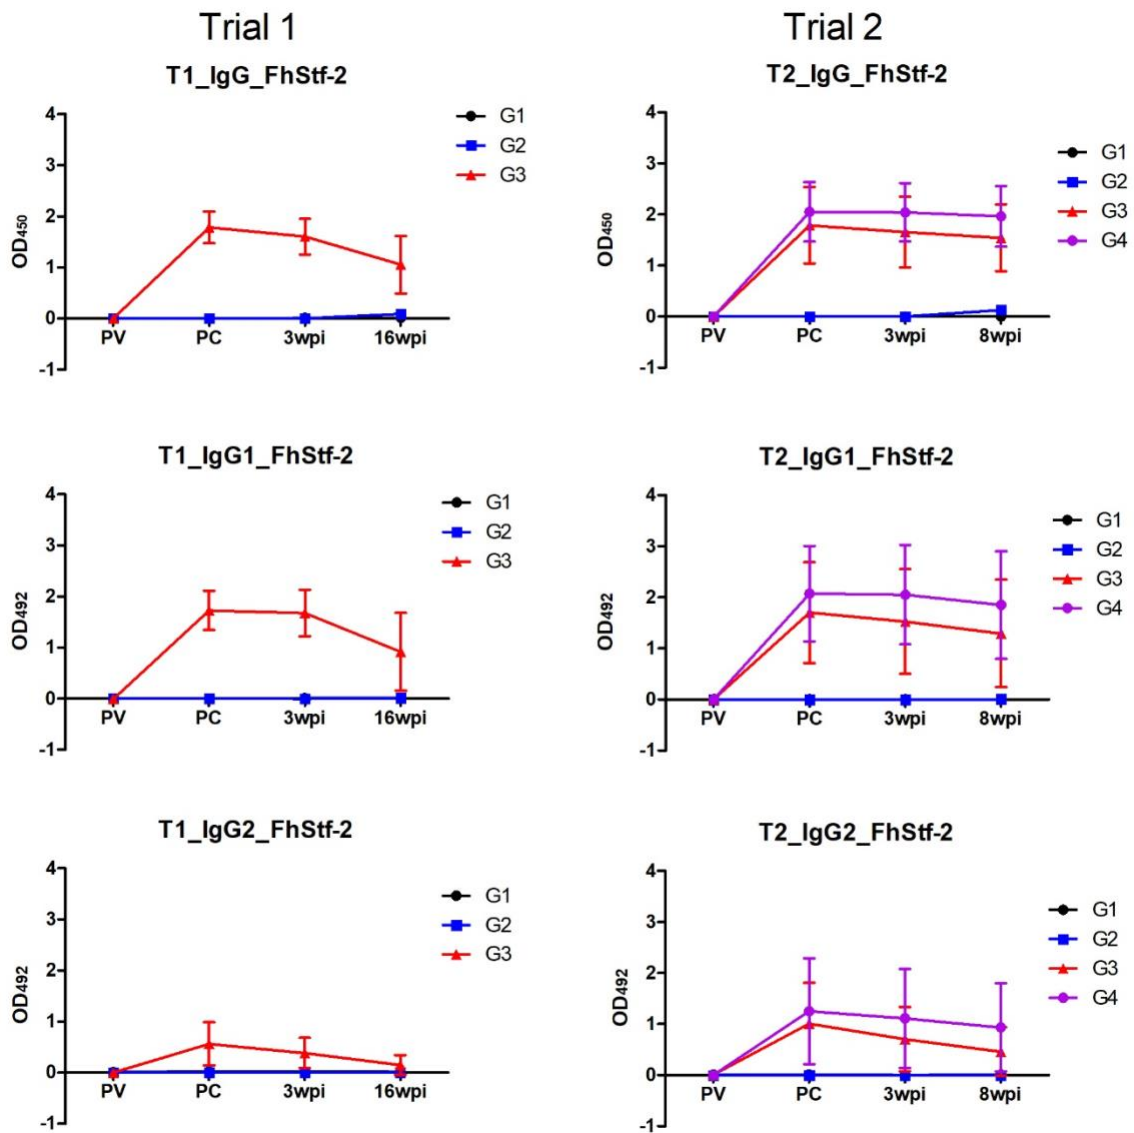

(C) Antibody responses to *F. hepatica* recombinant Stefin 3 (rFhStf-3).

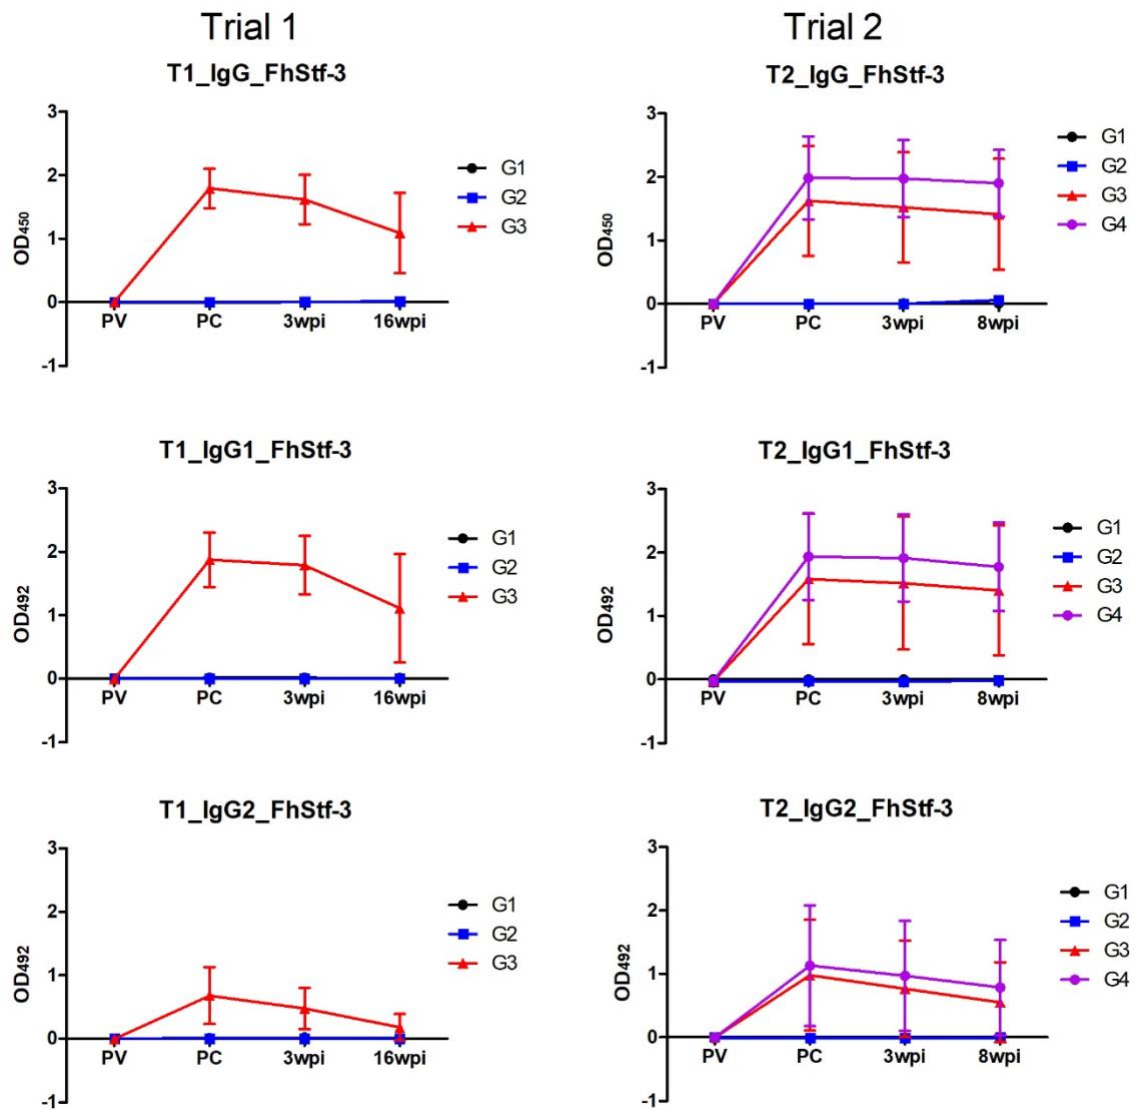

(D) Antibody responses to *F. hepatica* recombinant Kunitz-type inhibitor 1 (rFhKT1).

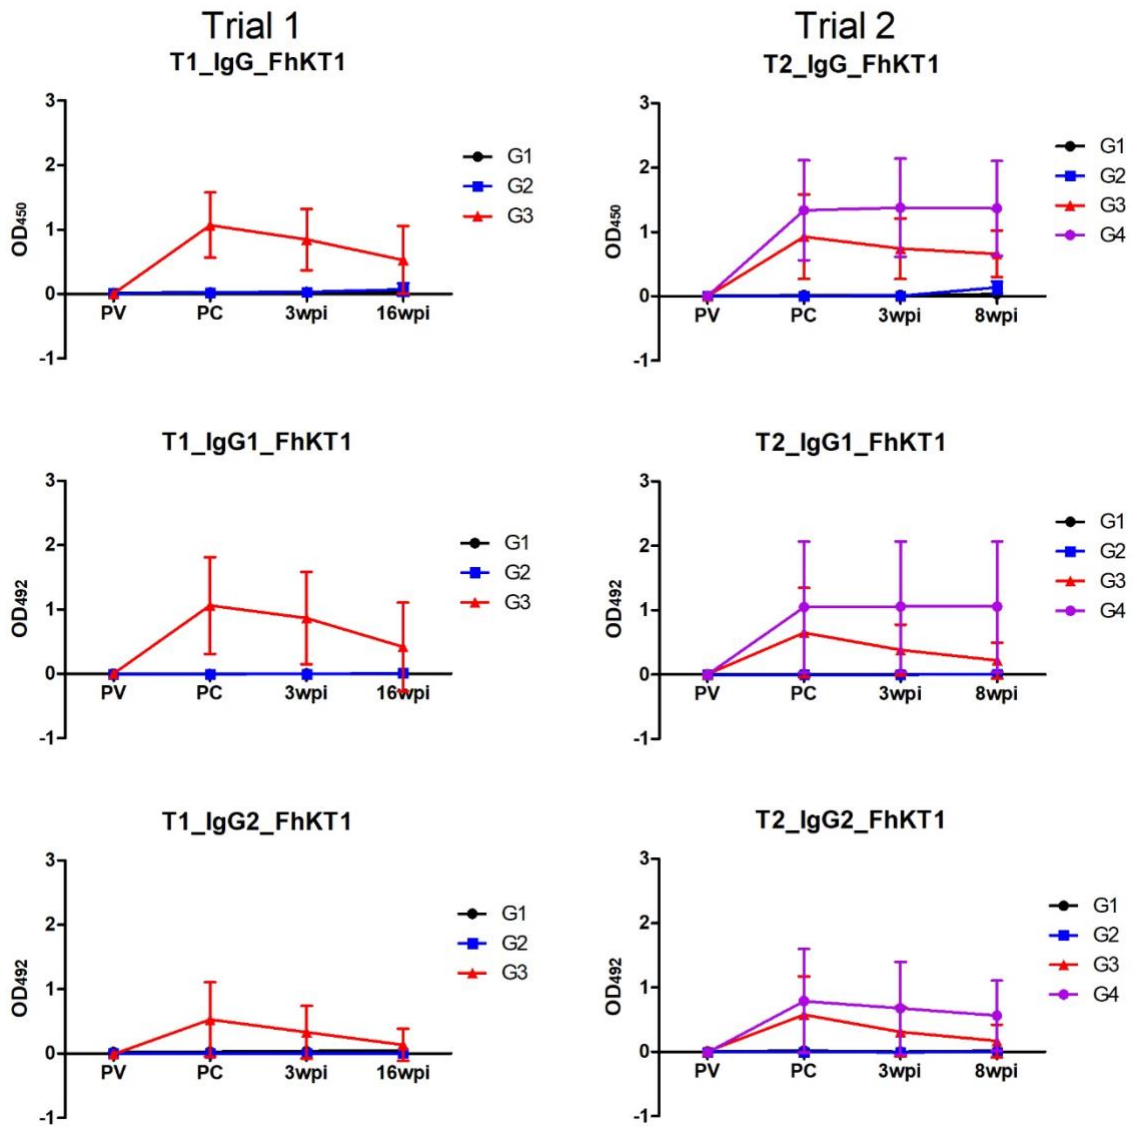

**Table S1. Inhibition assays to determine specificity of the recombinant protease inhibitors (rFhStf-1, rFhStf-2, rFhStf-3 and rFhKT1).**

Methodology: The inhibitory specificity of the recombinant proteins was analysed against a range of *F. hepatica* and mammalian cysteine proteases. rFhStf-1, rFhStf-2 and rFhStf-3 (500 nM and 10 nM) were first incubated with each protease in 100 µl of reaction buffer for 10 min at 37°C. The reaction volumes were brought to 200 µl with the addition of fluorogenic substrate dissolved in reaction buffer. Proteolytic activity was measured as RFU (relative fluorescent units) using a PolarStar Omega spectrophotometer (BMG LabTech, UK). Inhibition constants were determined using the Morrison equation for tight-binding inhibition as previously described [21]. All the screening assays were performed in triplicate at 37°C, using the reaction conditions and substrates detailed below (A). The *F. hepatica* cysteine proteases, cathepsin L1 (rFhCL1), cathepsin L2 (rFhCL2) and cathepsin L3 (rFhCL3) were expressed as functionally active recombinant proteins in *P. pastoris* as previously described [23]. The human cysteine proteases used in this study included human cathepsin B, cathepsin L and cathepsin S (All from Sigma-Aldrich) and human cathepsin K (Enzo Life Sciences). The screening assays performed using the Kunitz-type inhibitor, rFhKT1, were previously described by Smith et al. [21,22].

**A. Fluorogenic assay conditions for protease inhibition screening.**

| Enzyme                                               | Assay Buffer*                  | Substrate (20 µM)   |
|------------------------------------------------------|--------------------------------|---------------------|
| <i>F. hepatica</i> cathepsin rL1<br>(rFhCL1; 2.7 nM) | 50 mM Citrate Phosphate Buffer | Z-Leu-Arg-NHMec     |
| <i>F. hepatica</i> cathepsin rL2<br>(rFhCL2; 5 nM)   | 50 mM Citrate Phosphate Buffer | Z-Leu-Arg-NHMec     |
| <i>F. hepatica</i> cathepsin rL3<br>(rFhCL3; 5 nM)   | 100 mM Sodium Acetate Buffer   | Z-Gly-Pro-Arg-NHMec |

|                                     |                              |                     |
|-------------------------------------|------------------------------|---------------------|
| <i>F. hepatica</i> NEJ ES           | 100 mM Sodium Acetate Buffer | Z-Gly-Pro-Arg-NHMec |
| <i>F. hepatica</i> Adult ES         | 100 mM Sodium Acetate Buffer | Z-Leu-Arg-NHMec     |
| Human cathepsin L<br>(HsCL; 0.2 nM) | 100 mM Sodium Acetate Buffer | Z-Phe-Arg-NHMec     |
| Human cathepsin K<br>(HsCK; 2 nM)   | 100 mM Sodium Acetate Buffer | Z-Phe-Arg-NHMec     |
| Human cathepsin S<br>(HsCS; 2 nM)   | 100 mM Sodium Acetate Buffer | Z-Val-Val-Arg-NHMec |
| Human cathepsin B<br>(HsCB; 3.6 nM) | 100 mM Sodium Acetate Buffer | Z-Phe-Arg-NHMec     |

\*All assay buffers were pH 5.5 and contained 1 mM DTT, 1 mM EDTA, 0.01% Brij L23

**B. Relative inhibition constants ( $K_i$ ) for rFhStf-1, rFhStf-2, rFhStf-3 and rFhKT1 against a panel of biologically relevant cysteine proteases.**

| Enzyme                                  | Inhibition Constant ( $K_i$ ), in nM |                          |                   |                   |
|-----------------------------------------|--------------------------------------|--------------------------|-------------------|-------------------|
|                                         | rFhStf-1                             | rFhStf-2                 | rFhStf-3          | rFhKT1            |
| <i>F. hepatica</i> cathepsin peptidases |                                      |                          |                   |                   |
| rFhCL1                                  | 0.9 ( $\pm$ 0.04)                    | 0.09 ( $\pm$ 0.03)       | 0.3 ( $\pm$ 0.01) | 0.4 ( $\pm$ 0.1)* |
| rFhCL2                                  | 0.2 ( $\pm$ 0.02)                    | 0.1 ( $\pm$ 0.02)        | 6.2 ( $\pm$ 2.1)  | 10 ( $\pm$ 0.3)*  |
| rFhCL3                                  | 0.2 ( $\pm$ 0.08)                    | 0.1 ( $\pm$ 0.01)        | 16 ( $\pm$ 3.2)   | 1.8 ( $\pm$ 0.6)# |
| Human cathepsin peptidases              |                                      |                          |                   |                   |
| Cathepsin L                             | 0.4 ( $\pm$ 0.06)                    | 0.02 pM ( $\pm$ 0.03 pM) | 1.8 ( $\pm$ 0.3)  | 1.6 ( $\pm$ 0.1)* |
| Cathepsin K                             | 0.5 ( $\pm$ 0.2)                     | 0.08 ( $\pm$ 0.07)       | 1 ( $\pm$ 0.1)    | 5 ( $\pm$ 0.3)*   |
| Cathepsin S                             | 2 ( $\pm$ 0.02)                      | 0.02 ( $\pm$ 0.009)      | 2 ( $\pm$ 0.05)   | NI*               |
| Cathepsin B                             | 6.6 ( $\pm$ 1.4)                     | 0.2 ( $\pm$ 0.02)        | 45 ( $\pm$ 0.9)   | NI*               |

NI: Not Inhibited

\*As reported by Smith et al. [21]

#As reported by Smith et al. [20]

**Table S2. Animal groups.**

| Trial | Group | Description                                                            |
|-------|-------|------------------------------------------------------------------------|
| 1     | G1    | Non-vaccinated, non-infected control                                   |
| 1     | G2    | Infected control                                                       |
| 1     | G3    | rFhStf-1, rFhStf-2, rFhStf-3 & rFhKT1 plus Montanide ISA 61 VG         |
| 2     | G1    | Non-vaccinated, non-infected control                                   |
| 2     | G2    | Infected control                                                       |
| 2     | G3    | rFhStf-1, rFhStf-2, rFhStf-3 & rFhKT1 plus Montanide ISA 61 VG         |
| 2     | G4    | rFhStf-1, rFhStf-2, rFhStf-3 & rFhKT1 plus CpG and Montanide ISA 61 VG |



**Table S3. Mean size of adult flukes recovered at necropsy.**

| Trial | Group | Length (cm) $\pm$ SD | Width (cm) $\pm$ SD | Area (cm <sup>2</sup> ) $\pm$ SD |
|-------|-------|----------------------|---------------------|----------------------------------|
| 1     | G2    | 1.71 $\pm$ 0.108     | 0.599 $\pm$ 0.081   | ND                               |
| 1     | G3    | 1.62 $\pm$ 0.260     | 0.581 $\pm$ 0.133   | ND                               |
| 2     | G2    | 2.26 $\pm$ 0.467     | 0.781 $\pm$ 0.131   | 1.60 $\pm$ 0.620                 |
| 2     | G3    | 2.14 $\pm$ 0.312     | 0.817 $\pm$ 0.105   | 1.50 $\pm$ 0.388                 |
| 2     | G4    | 2.12 $\pm$ 0.166     | 0.785 $\pm$ 0.108   | 1.42 $\pm$ 0.306                 |

ND – not determined

**Table S4. Parameters used for the Multivariate Regression analysis and details of the respective results.**

| <b>A. Variables displaying correlation coefficients of <math>\leq 0.8</math></b> |                                   |
|----------------------------------------------------------------------------------|-----------------------------------|
| <i>Parasite data</i>                                                             | <i>Liver pathology parameters</i> |
| Adult fluke number                                                               | Liver pathology score*            |
| Parasite isolate                                                                 | GLDH levels at 3 wpi              |
| Number of eggs in gall bladder                                                   | GLDH levels at 16 wpi*            |
| Mean length of adult fluke                                                       | GGT levels at 3 wpi               |
|                                                                                  | GGT levels at 16 wpi              |
| <i>Vaccine information</i>                                                       |                                   |
| Vaccine administration                                                           | <i>Haematological parameters</i>  |
| CpG included formulation                                                         | % Neutrophils at 3 wpi            |
|                                                                                  | % Neutrophils at 16 wpi           |
| <i>Animal</i>                                                                    | % Lymphocytes at 3 wpi            |
| Sex                                                                              | % Lymphocytes at 16 wpi           |
| Weight gain                                                                      | % Monocytes at 3 wpi              |
|                                                                                  | % Monocytes at 16 wpi             |
| <i>ELISA data</i>                                                                | % Eosinophils at 3 wpi            |
| Anti-FhKT1 IgG at 3 wpi                                                          | % Eosinophils at 16 wpi           |
| Anti-FhKT1 IgG1 at 3 wpi                                                         | Haemoglobin levels at 3 wpi       |
| Anti-FhKT1 IgG2 at 3 wpi                                                         | Haemoglobin levels at 16 wpi      |

\* Removed after stepwise backward regression analysis. wpi: weeks post-infection.

| <b>B. Weight gain model</b>                                        | Estimate   | Std. Error | t value | Pr(> t ) |
|--------------------------------------------------------------------|------------|------------|---------|----------|
| (Intercept)                                                        | -20.718262 | 48.784206  | -0.425  | 0.6730   |
| Sex-Male                                                           | -2.606739  | 1.948522   | -1.338  | 0.1875   |
| Vaccine-Yes                                                        | 3.501933   | 1.516680   | 2.309   | 0.0255 * |
| Isolate-South Gloucester                                           | -4.388211  | 2.156797   | -2.035  | 0.0477 * |
| CpG- Yes                                                           | 0.719172   | 1.600001   | 0.449   | 0.6552   |
| GLDH_3wpi                                                          | -0.006395  | 0.005320   | -1.202  | 0.2354   |
| GGT_3wpi                                                           | 0.066568   | 0.038613   | 1.724   | 0.0914 . |
| GGT_16wpi                                                          | -0.001814  | 0.005141   | -0.353  | 0.7259   |
| Neutrophils_3wpi                                                   | 0.092877   | 0.469650   | 0.198   | 0.8441   |
| Neutrophils_16wpi                                                  | 0.046092   | 0.057392   | 0.803   | 0.4260   |
| Lymphocyte_3wpi                                                    | 0.098554   | 0.460899   | 0.214   | 0.8316   |
| Lymphocyte_16wpi                                                   | 0.101266   | 0.047153   | 2.148   | 0.0370 * |
| Monocyte_3wpi                                                      | 0.544824   | 0.583441   | 0.934   | 0.3553   |
| Monocyte_16wpi                                                     | -0.301409  | 0.357789   | -0.842  | 0.4039   |
| Eosinophils_3wpi                                                   | 0.127782   | 0.460107   | 0.278   | 0.7825   |
| Eosinophils_16wpi                                                  | 0.132751   | 0.118791   | 1.118   | 0.2696   |
| Haem_3wpi                                                          | 0.099892   | 0.082996   | 1.204   | 0.2349   |
| IgG_FhKT1_3wpi                                                     | -3.667444  | 3.250359   | -1.128  | 0.2650   |
| IgG1_FhKT1_3wpi                                                    | -0.479227  | 2.421781   | -0.198  | 0.8440   |
| IgG2_FhKT1_3wpi                                                    | 3.342758   | 2.593903   | 1.289   | 0.2039   |
| Signif. codes: 0 '***', 0.001 '**', 0.01 '*', 0.05 '.', 0.1 ' ', 1 |            |            |         |          |
| Residual standard error: 3.384 on 46 degrees of freedom            |            |            |         |          |
| Multiple R-squared: 0.4392, Adjusted R-squared: 0.2075             |            |            |         |          |
| F-statistic: 1.896 on 19 and 46 DF, p-value: 0.03912               |            |            |         |          |

---

**C. Haemoglobin at 16 wpi model**

|                          | Estimate   | Std. Error | t value | Pr(> t )     |
|--------------------------|------------|------------|---------|--------------|
| (Intercept)              | -44.793127 | 110.932891 | -0.404  | 0.6882       |
| Sex-Male                 | -0.232692  | 4.430844   | -0.053  | 0.9583       |
| Vaccine-Yes              | 7.181043   | 3.448857   | 2.082   | 0.0429 *     |
| Isolate-South Gloucester | 8.454770   | 4.904450   | 1.724   | 0.0914 .     |
| CpG- Yes                 | -3.416858  | 3.638324   | -0.939  | 0.3526       |
| GLDH_3wpi                | -0.005457  | 0.012097   | -0.451  | 0.6540       |
| GGT_3wpi                 | 0.086757   | 0.087804   | 0.988   | 0.3283       |
| GGT_16wpi                | -0.027920  | 0.011691   | -2.388  | 0.0211 *     |
| Neutrophils_3wpi         | -1.195753  | 1.067961   | -1.120  | 0.2687       |
| Neutrophils_16wpi        | 1.181741   | 0.130507   | 9.055   | 8.67e-12 *** |
| Lymphocyte_3wpi          | -1.070384  | 1.048062   | -1.021  | 0.3125       |
| Lymphocyte_16wpi         | 1.332453   | 0.107224   | 12.427  | 2.63e-16 *** |
| Monocyte_3wpi            | -0.253090  | 1.326716   | -0.191  | 0.8495       |
| Monocyte_16wpi           | 1.273821   | 0.813596   | 1.566   | 0.1243       |
| Eosinophils_3wpi         | -0.737688  | 1.046261   | -0.705  | 0.4843       |
| Eosinophils_16wpi        | 1.481505   | 0.270126   | 5.485   | 1.70e-06 *** |
| Haem_3wpi                | 0.979771   | 0.188728   | 5.191   | 4.61e-06 *** |
| IgG_FhKT1_3wpi           | -13.843162 | 7.391156   | -1.873  | 0.0674 .     |
| IgG1_FhKT1_3wpi          | 0.251332   | 5.507012   | 0.046   | 0.9638       |
| IgG2_FhKT1_3wpi          | 13.441534  | 5.898407   | 2.279   | 0.0274 *     |

---

Signif. codes: 0 '\*\*\*', 0.001 '\*\*', 0.01 '\*', 0.05 '.', 0.1 ' ', 1  
Residual standard error: 7.696 on 46 degrees of freedom  
Multiple R-squared: 0.8387, Adjusted R-squared: 0.7721  
F-statistic: 12.59 on 19 and 46 DF, p-value: 2.147e-12

---

---

**D. Fluke number model**

|                          | Estimate   | Std. Error | t value | Pr(> t )   |
|--------------------------|------------|------------|---------|------------|
| (Intercept)              | 324.815025 | 302.455497 | 1.074   | 0.28846    |
| Sex-Male                 | -7.678076  | 12.080576  | -0.636  | 0.52820    |
| Vaccine-Yes              | 6.206703   | 9.403214   | 0.660   | 0.51251    |
| Isolate-South Gloucester | -42.662987 | 13.371850  | -3.191  | 0.00256 ** |
| CpG-Yes                  | -1.023274  | 9.919790   | -0.103  | 0.91829    |
| GLDH_3wpi                | 0.060903   | 0.032981   | 1.847   | 0.07124 .  |
| GGT_3wpi                 | -0.414985  | 0.239394   | -1.733  | 0.08971 .  |
| GGT_16wpi                | 0.006342   | 0.031876   | 0.199   | 0.84318    |
| Neutrophils_3wpi         | -1.077116  | 2.911768   | -0.370  | 0.71314    |
| Neutrophils_16wpi        | -0.320339  | 0.355824   | -0.900  | 0.37266    |
| Lymphocyte_3wpi          | -0.836674  | 2.857511   | -0.293  | 0.77099    |
| Lymphocyte_16wpi         | -0.588364  | 0.292343   | -2.013  | 0.05003 .  |
| Monocyte_3wpi            | -3.771954  | 3.617254   | -1.043  | 0.30251    |
| Monocyte_16wpi           | -2.158900  | 2.218246   | -0.973  | 0.33552    |
| Eosinophils_3wpi         | -1.375086  | 2.852601   | -0.482  | 0.63206    |
| Eosinophils_16wpi        | -0.730712  | 0.736490   | -0.992  | 0.32631    |
| Haem_3wpi                | -0.531728  | 0.514562   | -1.033  | 0.30684    |
| IgG_FhKT1_3wpi           | -8.409515  | 20.151785  | -0.417  | 0.67839    |
| IgG1_FhKT1_3wpi          | 4.287234   | 15.014718  | 0.286   | 0.77652    |
| IgG2_FhKT1_3wpi          | 0.015487   | 16.081846  | 0.001   | 0.99924    |

---

Signif. codes: 0 '\*\*\*', 0.001 '\*\*', 0.01 '\*', 0.05 '.', 0.1 ' ', 1

Residual standard error: 20.98 on 46 degrees of freedom

Multiple R-squared: 0.5523, Adjusted R-squared: 0.3673

F-statistic: 2.986 on 19 and 46 DF, p-value: 0.001248

---
